# Supplementary material for: Clinical characteristics and risk factors for coronavirus disease 2019 (COVID-19) among patients under investigation in Thailand
Source: PLoS One. 2020 Sep 15;15(9):e0239250. doi: 10.1371/journal.pone.0239250 (PMC7491739; doi:10.1371/journal.pone.0239250)
Supplement: S1 Table — (XLSX) [file pone.0239250.s001.xlsx]

## Sheet: Sheet1
id	age	m0f1	nationality	religion	buddist_yn	location	occupation	medcov	medcov_yn	abroad	contactabroad	contactprovince	riskplace	riskplace_yn	sickcovid	contacturi	contactupn	placewithcovid	placewithcovid_yn	symptom	duration	fever	drycough	expectoration	congest	rhinorrhea	sorethroat	sob	myalgia	nv	headache	fatigue	diarrhea	anosmia	arrivalstatus	typepatient	temp	pulse	rr	sat	sbp	dbp	height	weight	bmi	pe	heent	injectpharynx	tonsil
203	37	1	0	0	1	0	1	2	1	0	0	0	7	1	0	0	0		0	1	6	1	1	0	0	0	1	0	1	0	0	0	0	0	0	0										0	0	0	0
93	39	1	0	0	1	0	8	3	0	1	0	0	0	0	1	0	0		0	1	2	1	0	0	0	0	0	0	0	0	0	0	0	0	0	0	37	114		99						0	0	0	0
32	31	1	0	0	1	0	0	0	0	0	0	0	0	0	1	0	0	1	1	1	7	0	0	1	0	1	1	1	0	0	1	0	1	0	0	0	37			99						1	1	0	1
416	69	0	0	0	1	0	0	3	0	0	0	0	0	0	0	0	0		0	1	14	1	0	1	0	0	0	1	0	0	0	0	0	0	0	0	38	89	24	98	157	93	160	70		0	0	0	0
263	43	1	0	0	1	0	1	2	1	0	0	0	7	1	0	0	0		0	1	7	1	0	0	0	0	0	1	0	0	0	0	0	0	0	0										0	0	0	0
397	76	1	0	0	1	0	0	1	1	0	0	0	0	0	0	0	0		0	1	4	1	0	1	0	1	0	1	0	0	0	0	0	0	0	0	38	76	26		141	65				0	0	0	0
200	31	1	0	0	1	0	6	3	0	0	0	0	0	0	0	0	0		0	1	6	0	1	0	0	0	0	1	0	0	0	1	0	0	0	0										0	0	0	0
285	22	0	0	0	1	0	0	3	0	0	0	0	0	0	1	0	0	1	1	1	14	0	1	0	0	0	0	0	0	0	0	0	0	0	0	0										0	0	0	0
411	87	0	0	0	1	0	2	1	1	0	0	0	0	0	0	0	0		0	1	3	0	1	1	0	0	0	1	0	1	0	0	0	0	0	0	38	111	28	95	161	75	166	55		0	0	0	0
91	42	1	0	0	1	2	1	2	1	0	0	0	7	1	1	0	0	1	1	0		0	0	0	0	0	0	0	0	0	0	0	0	0	0	0	37	112		99						0	0	0	0
164	27	1	0	0	1	0	0	3	0	0	0	0	0	0	1	0	0	1	1	1		0	1	0	0	0	0	0	1	0	0	1	0	0	0	0										0	0	0	0
54	41	1	0	0	1	0	0	1	1	0	0	0	0	0	1	0	0		0	1	3	1	1	0	0	0	0	1	1	0	0	0	1	0	0	0	37	80		97						0	0	0	0
158	23	0	0	0	1	0	0	3	0	0	0	0	0	0	0	0	0		0	1	2	0	0	1	0	0	1	1	0	0	0	0	0	0	0	0										1	1	1	0
403	53	1	0	0	1	0	4	3	0	0	0	0	6	1	0	0	0		0	1	2	0	1	0	0	1	0	1	0	1	1	1	1	0	0	0										1	0	0	0
370	33	0	0	0	1	0	3	3	0	0	1	0	0	0	1	0	0	2	1	1	3	0	1	1	0	1	1	1	0	0	0	0	0	0	0	0	37									0	0	0	0
77	30	0	0	0	1	0	7	3	0	0	0	0	0	0	1	0	0	0	1	1		0	1	0	0	0	0	1	0	0	0	0	0	0	0	0	37	81		95						0	0	0	0
366	22	1	0	0	1	0	8	3	0	0	0	0	0	0	1	0	0	2	1	1	1	0	0	0	0	0	1	0	0	0	0	0	0	0	0	0	37									0	0	0	0
180	47	0	0	0	1	0	5	0	0	0	0	0	3	1	1	0	0	2	1	1	13	0	1	0	0	0	1	0	1	0	0	0	0	0	0	0										1	1	1	1
245	38	1	0	0	1	4	3	3	0	0	0	0	2	1	1	0	0	1	1	1	8	0	1	0	0	0	0	0	0	0	0	0	0	0	0	0	37									0	0	0	0
182	55	0	0	0	1	1	5	3	0	0	0	0	3	1	1	0	0	2	1	1		0	1	0	0	1	0	1	0	0	0	0	0	0	0	0										1	1	1	0
134	23	1	0	0	1	0	8	3	0	1	0	0	0	0	0	0	0		0	1	1	1	0	1	0	0	0	0	0	0	0	0	0	1	0	0	37	95		97						0	0	0	0
123	33	1	0	0	1	0	1	3	0	0	0	0	7	1	1	0	0	1	1	1	5	0	1	0	0	0	1	0	0	0	0	0	0	0	0	0	37	106		97						0	0	0	0
104	63	1	0	0	1	0	0	3	0	0	0	0	0	0	0	0	0		0	1	1	1	0	0	0	0	0	0	0	0	0	0	0	0	0	0	36	90		96						0	0	0	0
168	41	0	0	0	1	0	3	3	0	0	0	0	2	1	1	0	0	1	1	0	0	0	0	0	0	0	0	0	0	0	0	0	0	0	0	0	37									0	0	0	0
419	39	1	0	0	1	0	2	3	0	0	0	0	0	0	0	0	0		0	1	14	0	1	0	0	0	0	1	0	0	0	1	1	0	2	0	38	143	32	99	113	83	160	73		0	0	0	0
209	25	0	0	0	1	0	8	3	0	1	0	0	0	0	1	0	0	2	1	1	2	0	0	0	0	0	1	0	0	0	0	0	0	0	0	0										0	0	0	0
280	25	1	0	0	1	0	6	3	0	0	0	0	0	0	1	0	0	1	1	1	9	0	1	0	0	0	0	0	0	0	0	0	0	0	0	0										0	0	0	0
384	31	1	0	0	1	0	6	3	0	0	0	0	8	1	0	0	0		0	1	2	1	1	1	0	1	0	1	1	0	0	0	1	0	0	0	38									1	1	1	0
13	26	1	0	0	1	0	0	1	1	0	0	0	0	0	0	0	0		0	1	3	1	1	0	0	0	0	0	0	0	1	0	0	0	0	0	38	132	20	98	139	89	150	67	30	0	0	0	0
171	41	1	0	0	1	0	0	0	0	0	0	0	0	0	1	0	0	1	1	1	15	1	0	0	0	0	0	0	0	0	0	0	0	0	0	0										0	0	0	0
363	26	0	0	0	1	0	0	3	0	0	0	0	0	0	1	0	0		0	1	7	0	1	0	0	1	0	0	1	0	1	0	0	0	0	0	37									0	0	0	0
26	28	1	0	0	1	4	1	0	0	0	0	0	7	1	1	0	0	0	1	1	7	0	1	0	0	1	1	1	0	0	0	0	0	0	0	0										0	0	0	0
36	33	0	0	0	1	0	0	1	1	0	0	0	5	1	1	0	0	1	1	1	1	1	1	0	0	0	0	1	0	0	0	0	0	0	0	0										0	0	0	0
377	23	0	0	0	1	0	3	3	0	0	0	0	2	1	1	0	0	1	1	1	2	1	0	0	0	0	0	0	1	1	0	1	1	0	0	0	38									0	0	0	0
373	40	0	0	0	1	0	3	3	0	0	0	0	0	0	1	0	0	0	1	1	4	0	1	1	0	0	0	1	0	0	0	0	0	0	0	0	37									0	0	0	0
382	35	1	0	0	1	0	2	3	0	0	1	0	0	0	1	0	0	0	1	1		0	1	0	0	0	1	0	1	0	0	0	0	0	0	0	37									0	0	0	0
38	26	0	0	0	1	0	0	3	0	1	0	0	6	1	1	0	0	2	1	1	4	1	1	0	0	0	1	1	0	0	0	0	0	0	0	0										0	0	0	0
230	22	1	0	0	1	0	8	3	0	0	1	0	0	0	0	0	0		0	1	10	1	1	0	0	1	0	0	0	0	1	0	0	0	0	0	37									0	0	0	0
288	63	1	0	0	1	0	0	1	1	0	0	0	0	0	0	0	0		0	1	11	1	1	1	0	0	0	1	0	0	0	0	0	0	0	0										0	0	0	0
224	37	0	0	0	1	0	5	3	0	0	0	0	0	0	1	0	0	1	1	1	1	1	0	0	0	0	0	0	0	0	0	0	0	0	0	0	38									0	0	0	0
274	27	1	0	0	1	0	0	3	0	0	0	0	0	0	1	0	0		0	1		1	1	1	0	1	0	0	1	0	0	0	0	0	0	0										0	0	0	0
34	24	1	0	0	1	0	0	3	0	0	0	0	0	0	1	0	0	1	1	1	4	0	0	1	0	0	0	0	0	0	0	1	1	0	0	0	37			98						0	0	0	0
169	28	1	0	0	1	0	3	0	0	1	1	0	2	1	1	0	0	1	1	1	7	0	0	1	0	1	1	0	1	0	1	0	1	0	0	0										0	0	0	0
63	34	0	0	0	1	0	0	3	0	0	0	0	0	0	0	0	0		0	1	12	0	0	1	0	0	1	1	0	0	0	0	0	0	0	0	37	92		97						0	0	0	0
15	60	0	0	0	1	0	7	1	1	0	0	0	6	1	0	0	0		0	1		1	1	0	0	0	1	0	0	0	0	0	0	0	0	0	37									0	0	0	0
86	35	1	0	0	1	0	6	1	1	0	0	0	0	0	0	0	0		0	1	1	1	0	0	0	0	0	0	0	0	0	1	0	0	0	0	38	106		98						0	0	0	0
414	52	1	0	0	1	0	7	1	1	0	0	0	0	0	0	0	0		0	1	3	0	1	0	0	1	0	0	0	1	0	0	0	0	0	0	36	110	20	98	160	80	155	58		0	0	0	0
313	33	1	0	0	1	0	1	1	1	0	0	0	7	1	1	0	0	0	1	1	7	0	1	1	0	1	1	0	0	0	1	0	0	0	0	0										0	0	0	0
124	52	1	0	0	1	0	1	2	1	0	0	0	7	1	1	0	0	1	1	1		1	0	0	0	1	0	1	1	0	0	0	0	0	0	0	37	86		97						0	0	0	0
357	27	1	0	0	1	0	1	3	0	0	0	0	7	1	0	0	0		0	1	8	1	1	0	0	0	1	0	0	1	0	0	0	0	0	0	37									0	0	0	0
211	25	1	0	0	1	0	5	3	0	0	0	0	0	0	1	0	0	1	1	1	2	0	1	0	0	1	1	0	0	0	0	0	0	0	0	0										1	1	1	0
96	73	0	0	0	1	0	5	2	1	0	0	0	0	0	0	0	0		0	1	9	0	1	1	0	0	1	0	0	0	0	1	0	0	0	0	37	64		99						1	1	1	0
238	22	1	0	0	1	0	8	3	0	0	0	0	0	0	1	0	0	0	1	1	1	0	0	0	0	0	1	0	0	0	0	0	0	0	0	0	37									0	0	0	0
50	37	1	0	0	1	0	0	3	0	0	0	0	2	1	0	0	0		0	1	1	1	1	0	0	1	1	1	0	0	0	1	0	0	0	0	37	103		96						0	0	0	0
198	44	0	0	0	1	0	6	1	1	0	0	0	0	0	0	0	0		0	1	8	1	1	0	0	0	1	0	0	0	0	0	0	0	0	0										0	0	0	0
351	45	0	0	0	1	0	5	3	0	0	0	0	0	0	1	0	1	0	1	0		0	0	0	0	0	0	0	0	0	0	0	0	0	0	0										0	0	0	0
350	33	1	0	0	1	2	3	3	0	0	0	0	0	0	1	0	0	0	1	1	1	0	0	0	0	1	0	0	0	0	0	0	0	0	0	0	37									0	0	0	0
108	25	0	0	0	1	0	0	3	0	0	0	0	0	0	1	0	0	1	1	1	17	0	1	1	0	0	0	0	0	0	0	0	0	0	0	0	36	92		99						0	0	0	0
348	39	0	0	2	0	0	6	2	1	0	0	0	0	0	1	0	0		0	0		0	0	0	0	0	0	0	0	0	0	0	0	0	0	0	37									0	0	0	0
347	30	1	0	0	1	5	1	1	1	0	0	0	7	1	1	0	0	1	1	1	4	1	1	0	0	0	0	0	0	0	0	0	0	0	0	0	38									0	0	0	0
295	23	0	0	0	1	0	8	3	0	0	0	0	2	1	1	0	0	2	1	1	7	0	0	0	0	0	0	1	0	0	0	0	0	0	0	0										0	0	0	0
141	35	0	0	0	1	0	0	3	0	1	0	0	0	0	1	0	0		0	1	5	0	1	0	0	1	1	0	0	0	0	0	0	0	0	0	37	98		98						1	1	1	0
368	32	1	0	0	1	0	0	3	0	0	0	0	0	0	1	0	0	0	1	1	7	0	0	1	0	1	0	0	0	0	0	1	0	0	0	0	37									0	0	0	0
261	26	0	0	0	1	0	8	3	0	1	0	0	0	0	1	0	0	2	1	1	1	0	1	0	0	0	0	0	0	0	0	0	0	0	0	0										0	0	0	0
99	28	1	0	0	1	5	8	3	0	0	0	0	0	0	0	0	0	0	1	1	9	1	1	0	0	0	1	0	0	0	0	0	0	0	0	0	38			97						1	1	1	0
61	45	0	0	0	1	0	6	1	1	0	0	0	0	0	1	0	0		0	1		0	0	1	0	0	1	0	0	0	0	0	0	0	0	0	37	84		97						1	1	0	1
339	27	0	0	0	1	0	7	3	0	1	0	0	2	1	1	0	0	2	1	1	3	1	0	0	0	0	0	1	1	0	1	0	0	0	0	0	37									0	0	0	0
338	43	0	0	0	1	4	4	3	0	0	1	0	3	1	0	0	0		0	1	1	1	0	0	0	0	1	0	1	0	0	0	0	0	0	0	37									1	1	0	1
97	41	0	0	0	1	0	4	2	1	0	0	0	0	0	0	0	0		0	1	3	1	1	0	0	0	0	0	0	1	1	0	0	0	0	0	39	110		97						1	1	1	1
4	32	0	0	0	1	0	0	3	0	0	0	0	0	0	1	0	0	1	1	1	2	1	0	0	0	0	1	0	0	0	0	0	1	0	0	0	37	85		99						0	0	0	0
332	23	1	0	0	1	4	6	3	0	0	0	0	0	0	1	0	0	2	1	1	1	1	1	0	0	1	1	0	0	0	0	0	0	0	0	0	38									0	0	0	0
334	45	0	0	0	1	0	4	3	0	0	0	0	0	0	0	0	0		0	1	3	1	0	0	0	0	1	1	0	0	0	0	0	0	0	0	37									0	0	0	0
333	39	1	0	0	1	0	6	3	0	0	0	0	0	0	1	0	0	0	1	1	1	0	0	0	0	1	0	1	1	0	0	0	0	0	0	0	37									0	0	0	0
79	34	1	0	0	1	0	8	3	0	0	0	0	0	0	1	0	0	1	1	1	2	0	0	0	0	0	1	1	0	0	0	0	0	0	0	0	36	96		98						0	0	0	0
146	45	1	0	0	1	0	0	2	1	1	0	0	0	0	0	0	0		0	1	4	1	0	1	0	0	1	1	1	0	0	1	0	0	0	0	37	80		98						0	0	0	0
330	29	0	0	0	1	0	1	2	1	0	0	0	7	1	1	0	0		0	1	2	1	1	0	0	0	1	0	0	0	0	0	1	0	0	0	37									0	0	0	0
145	29	0	0	0	1	0	3	3	0	1	0	0	2	1	1	0	0	1	1	1	4	1	0	1	0	1	0	1	1	0	0	0	1	0	0	0	37	88		96						0	0	0	0
40	33	1	0	0	1	0	0	1	1	0	0	0	0	0	1	0	0	1	1	1	3	0	1	0	0	0	1	0	0	0	0	0	0	0	0	0	37	104		96						0	0	0	0
42	27	1	0	0	1	0	0	3	0	0	0	0	0	0	0	0	0		0	1		1	0	0	0	0	0	0	0	0	0	1	0	0	0	0	40	146								0	0	0	0
81	27	0	0	0	1	0	7	3	0	0	0	0	0	0	1	0	0	2	1	1	2	0	1	0	1	1	0	1	0	0	0	0	0	0	0	0	37	72		97						0	0	0	0
48	51	0	0	0	1	0	4	3	0	0	0	0	6	1	0	0	0		0	0		0	0	0	0	0	0	0	0	0	0	0	0	0	0	0										0	0	0	0
234	35	1	0	0	1	0	7	3	0	0	0	0	8	1	1	0	0	2	1	1	3	1	1	0	0	0	1	0	0	0	0	0	0	0	0	0	37									0	0	0	0
52	41	1	0	0	1	0	1	2	1	0	0	0	7	1	1	0	0		0	1	1	0	0	0	0	0	1	1	1	0	0	1	0	0	0	0	37	120		96						0	0	0	0
378	18	1	0	0	1	0	8	3	0	0	0	0	0	0	1	0	0		0	1	4	0	1	0	0	0	0	1	1	0	0	0	0	0	0	0	37									0	0	0	0
386	34	0	0	0	1	0	3	3	0	0	0	0	2	1	1	0	0	1	1	1	3	1	1	0	0	1	1	0	1	0	0	0	0	0	0	0	37									0	0	0	0
78	37	1	0	0	1	0	5	3	0	0	0	0	0	0	1	0	0		0	1	2	1	0	1	0	0	0	0	0	0	0	0	0	0	0	0	36	94		97						0	0	0	0
315	21	0	0	0	1	4	8	3	0	0	0	0	2	1	1	0	0	0	1	1	1	0	0	0	0	1	0	0	0	0	0	0	0	0	0	0										0	0	0	0
67	50	1	0	0	1	0	0	3	0	1	0	0	0	0	0	0	0		0	1	4	1	0	0	0	0	1	0	0	0	0	0	0	0	0	0										0	0	0	0
195	27	1	0	0	1	0	6	2	1	0	0	0	0	0	0	0	0		0	1	3	0	0	0	0	0	1	1	0	0	0	0	0	0	0	0	36									0	0	0	0
5	27	1	0	0	1	1	7	0	0	0	1	0	0	0	0	0	0		0	1	1	1	0	0	0	1	1	0	0	0	0	0	0	0	0	0										0	0	0	0
306	29	1	0	0	1	5	1	3	0	0	0	0	7	1	1	0	0	1	1	1	1	1	1	0	0	0	1	0	1	0	0	0	0	0	0	0										0	0	0	0
317	26	1	0	0	1	0	1	2	1	0	0	0	7	1	1	0	0		0	1	4	1	0	0	0	0	1	1	1	0	0	0	0	0	0	0										0	0	0	0
131	43	1	0	0	1	0	6	3	0	0	0	0	0	0	1	0	0	0	1	1	8	1	0	0	0	0	0	0	1	0	0	0	0	0	0	0	38	110		98						0	0	0	0
276	22	1	0	0	1	0	8	3	0	0	0	0	2	1	1	0	0	2	1	1	8	0	1	1	0	0	0	0	1	0	0	0	0	0	0	0										0	0	0	0
126	26	0	0	0	1	0	1	2	1	0	0	0	7	1	0	0	0		0	1		1	0	0	0	0	1	0	1	0	0	0	0	0	0	0	38	104		97						0	0	0	0
194	37	1	0	0	1	0	1	2	1	0	0	0	7	1	1	0	0	1	1	0	0	0	0	0	0	0	0	0	0	0	0	0	0	0	0	0										0	0	0	0
46	48	1	0	0	1	0	0	3	0	1	0	0	0	0	0	0	0		0	1	2	1	1	0	0	1	1	0	0	0	0	0	0	0	0	0										0	0	0	0
112	27	1	0	0	1	0	0	3	0	0	0	0	0	0	1	0	0	0	1	1	12	0	1	1	0	0	1	1	0	0	0	0	0	0	0	0	37	80		99						0	0	0	0
283	23	1	0	0	1	0	0	3	0	0	0	0	0	0	1	0	0		0	1	5	0	1	0	0	1	0	0	0	0	0	0	0	0	0	0										0	0	0	0
55	48	0	0	0	1	0	7	1	1	0	0	0	0	0	1	0	0	1	1	1	4	0	1	0	0	1	1	0	1	0	0	0	0	0	0	0	37	110		98						0	0	0	0
10	54	1	0	0	1	0	0	1	1	0	1	0	0	0	0	0	0		0	1	4	0	0	0	0	0	0	0	1	0	0	0	0	0	0	0										1	1	1	0
223	29	1	0	0	1	0	0	0	0	0	0	0	0	0	1	0	0	0	1	1	2	0	1	0	0	0	0	0	0	0	0	0	0	0	0	0	37									0	0	0	0
178	27	1	0	0	1	0	5	3	0	0	0	0	0	0	1	0	0	1	1	1	6	1	0	0	0	1	1	1	0	0	0	0	0	0	0	0										1	1	1	1
71	44	1	0	0	1	0	0	3	0	0	0	0	0	0	1	0	0	1	1	1	3	1	0	1	0	1	1	1	1	0	1	0	0	0	0	0	36	68		99						1	1	1	1
133	27	0	0	0	1	0	0	3	0	1	0	0	0	0	1	0	0	0	1	1	4	0	1	0	0	0	0	1	0	0	0	0	0	0	0	0	37	87		98						0	0	0	0
287	58	0	0	0	1	0	7	2	1	0	0	0	0	0	0	0	0		0	1	3	0	1	0	0	0	1	1	0	0	0	0	0	0	0	0										0	0	0	0
321	38	1	0	0	1	0	0	1	1	0	0	0	6	1	0	0	0		0	1	3	1	1	1	0	0	1	0	0	0	0	0	0	0	0	0										0	0	0	0
279	29	1	0	0	1	5	1	1	1	0	0	0	7	1	1	0	0	1	1	1	3	1	1	0	0	0	1	0	0	0	0	0	0	0	0	0										1	1	1	1
151	34	0	0	0	1	0	0	3	0	0	0	0	0	0	1	0	0	1	1	1	1	0	0	0	0	0	1	0	0	0	0	0	0	0	0	0										1	1	1	0
241	40	1	0	0	1	0	0	3	0	0	0	0	0	0	1	0	0		0	0		0	0	0	0	0	0	0	0	0	0	0	0	0	0	0	37									0	0	0	0
60	52	0	0	0	1	0	5	1	1	0	0	0	0	0	0	0	0		0	1	1	1	0	0	0	0	0	1	0	0	0	0	0	0	0	0	37	140		94						1	0	0	0
294	46	0	0	0	1	1	3	3	0	0	0	0	2	1	1	0	0	1	1	1	4	0	0	0	0	0	1	0	0	0	0	0	0	0	0	0										0	0	0	0
27	24	0	0	0	1	0	0	3	0	0	0	0	0	0	1	0	0	0	1	1	3	0	0	0	0	0	0	0	0	0	1	0	0	0	0	0										0	0	0	0
107	21	1	0	0	1	4	7	2	1	0	0	0	7	1	0	0	0		0	1	5	0	1	1	0	0	1	0	0	0	0	0	0	0	0	0	37	111		97						1	1	1	1
23	24	1	0	0	1	0	8	3	0	0	0	0	0	0	1	0	0	1	1	1	7	1	0	1	0	1	0	0	1	0	0	0	0	0	0	0										0	0	0	0
369	38	0	0	0	1	0	2	2	1	0	0	0	0	0	0	0	0		0	1	2	1	0	0	0	0	0	1	0	0	0	0	0	0	2	0	38	120	20	95	178	99				1	0	0	0
22	22	0	1	0	1	0	0	3	0	1	0	0	0	0	1	0	0	2	1	1	3	0	1	0	0	0	0	1	0	0	0	0	1	0	0	0										0	0	0	0
372	42	1	0	0	1	0	7	3	0	0	0	0	0	0	1	0	0		0	1	2	0	1	0	0	1	1	0	0	0	0	0	1	0	0	0	37									0	0	0	0
39	24	1	0	0	1	0	0	3	0	0	0	0	2	1	1	0	0	2	1	1	1	1	1	0	0	0	1	1	1	0	0	0	0	0	0	0										0	0	0	0
84	38	1	0	0	1	0	0	3	0	0	0	0	0	0	1	0	0		0	1	2	0	1	0	0	1	1	0	0	0	0	0	0	0	0	0	37	97		98						0	0	0	0
181	21	1	0	0	1	0	8	0	0	0	0	0	2	1	0	0	0		0	1		0	0	1	0	0	1	0	0	0	0	0	0	0	0	0										0	0	0	0
259	45	1	0	0	1	0	0	1	1	0	0	0	0	0	0	0	0		0	1		1	0	1	0	0	1	0	1	0	0	0	0	0	0	0										0	0	0	0
267	38	0	0	0	1	0	0	3	0	0	0	0	0	0	1	0	0	1	1	1		1	1	0	0	0	0	0	0	0	0	0	0	0	0	0										1	1	1	0
19	40	0	1	0	1	0	0	3	0	0	1	0	0	0	0	0	0		0	1	16	0	1	0	0	1	1	1	0	1	1	1	1	0	0	0										1	1	1	0
150	37	1	0	0	1	0	0	3	0	0	0	0	5	1	0	0	0		0	1	1	0	0	0	0	0	1	0	0	0	0	0	0	0	0	0										1	1	1	0
17	30	0	0	0	1	5	0	1	1	0	0	0	0	0	1	0	0	1	1	1	1	1	0	0	0	0	1	0	1	0	1	0	0	0	0	0				97						1	1	1	0
1	61	1	0	0	1	0	0	1	1	0	0	0	0	0	1	0	0	1	1	1		1	1	0	0	0	0	0	1	0	0	1	0	0	0	0	39	116		97						0	0	0	0
262	29	1	0	0	1	0	1	1	1	0	0	0	7	1	0	0	0		0	1	2	1	0	0	0	0	1	0	0	1	1	0	0	0	0	0	37	80	18	98			157	49		0	0	0	0
226	37	1	0	0	1	0	3	0	0	0	1	0	2	1	1	0	0	1	1	1		0	1	0	0	0	1	0	0	0	0	0	0	0	0	0										0	0	0	0
138	41	1	0	0	1	0	0	3	0	0	0	0	0	0	1	0	0	0	1	0		0	0	0	0	0	0	0	0	0	0	0	0	0	0	0	37	80		99						0	0	0	0
120	23	0	0	0	1	0	8	3	0	1	0	0	0	0	0	0	0		0	1	3	1	0	1	0	0	1	0	0	0	1	0	0	0	0	0	37	68		97						0	0	0	0
258	37	1	0	0	1	0	0	2	1	0	0	0	0	0	1	0	0	1	1	1	4	0	0	1	0	0	0	0	0	0	1	0	0	0	0	0										0	0	0	0
400	48	1	0	0	1	4	2	2	1	0	0	0	0	0	0	0	0		0	1	7	0	0	1	0	0	0	0	0	1	0	1	0	0	0	0		109	18	97	111	73	159	50		1	0	0	0
6	53	1	0	0	1	0	0	1	1	0	0	0	0	0	1	0	0		0	1	1	1	1	0	0	1	0	0	1	0	0	0	0	0	0	0										0	0	0	0
65	39	1	0	0	1	0	7	1	1	0	0	0	0	0	0	0	0		0	1		1	0	1	0	0	0	0	0	0	0	1	0	0	0	0										0	0	0	0
253	60	1	0	0	1	0	0	2	1	0	0	0	0	0	1	0	0	1	1	0		0	0	0	0	0	0	0	0	0	0	0	0	0	0	0										0	0	0	0
252	30	0	0	0	1	0	0	2	1	0	0	0	0	0	1	0	0	1	1	0		0	0	0	0	0	0	0	0	0	0	0	0	0	0	0										0	0	0	0
354	43	1	0	0	1	0	1	3	0	0	0	0	7	1	1	0	0	1	1	1	2	0	0	1	0	0	1	1	1	0	1	1	0	0	0	0	37	84	22	99	160	100				1	0	0	0
336	33	1	0	0	1	0	0	3	0	0	0	0	0	0	1	0	0	1	1	1	6	0	1	0	1	0	1	0	1	0	1	0	0	0	0	0	37									0	0	0	0
270	24	0	0	0	1	0	0	3	0	0	0	0	0	0	1	0	0	0	1	1	1	0	0	0	0	0	1	0	0	0	0	0	0	0	0	0										0	0	0	0
218	35	0	0	0	1	0	5	3	0	0	0	0	0	0	1	0	0	1	1	1		0	1	0	0	1	0	0	0	0	0	0	0	0	0	0										0	0	0	0
76	29	1	0	0	1	0	5	3	0	0	0	0	0	0	1	0	0	1	1	1	4	1	0	0	0	0	0	1	0	0	0	0	0	0	0	0	37	98		98						0	0	0	0
266	32	1	0	0	1	0	1	1	1	0	0	0	7	1	0	0	0		0	1	7	0	1	1	0	0	0	1	0	0	0	0	1	0	0	0										0	0	0	0
137	36	1	0	2	0	5	0	1	1	0	0	0	0	0	0	0	0		0	1		0	1	1	0	1	1	0	1	0	0	0	0	0	0	0	38	107		97						0	0	0	0
364	28	1	0	0	1	0	6	3	0	0	0	0	0	0	1	0	0		0	1	3	0	1	1	0	0	1	0	1	1	0	0	0	0	0	0	37									0	0	0	0
240	32	0	0	0	1	0	3	3	0	0	0	0	6	1	1	0	0	1	1	1	14	0	0	1	0	1	0	0	0	0	0	0	0	0	0	0										0	0	0	0
176	50	1	0	0	1	0	0	0	0	0	0	0	0	0	0	0	0		0	1	14	1	1	0	0	0	0	1	0	0	0	0	1	0	0	0										0	0	0	0
159	32	1	0	0	1	0	6	3	0	0	0	0	0	0	1	0	0	1	1	1	1	0	0	1	0	1	0	0	0	0	0	0	0	0	0	0										1	1	1	0
255	30	1	0	0	1	0	0	2	1	0	0	0	0	0	1	0	0	1	1	0		0	0	0	0	0	0	0	0	0	0	0	0	0	0	0										0	0	0	0
237	35	0	0	0	1	0	7	1	1	0	0	0	5	1	0	0	0		0	1	7	1	1	0	0	0	1	1	0	0	0	0	0	0	0	0	37									0	0	0	0
72	31	1	0	0	1	0	6	3	0	0	0	0	0	0	1	0	0	1	1	1	2	1	0	1	0	0	1	1	0	1	1	0	0	0	0	0	36	90		98						1	1	1	1
337	39	0	1	0	1	0	6	3	0	0	0	0	0	0	1	0	0	1	1	1	1	1	0	0	0	1	0	1	0	0	1	0	0	0	0	0	37									0	0	0	0
148	23	1	0	0	1	0	8	2	1	0	0	0	0	0	1	0	0	1	1	1	2	0	0	0	0	1	0	0	0	0	0	0	0	0	0	0	37	94	20	99	111	75	155			0	0	0	0
231	22	1	0	0	1	0	8	3	0	0	0	0	0	0	1	0	0	2	1	1	4	1	0	0	0	0	1	0	1	0	0	0	0	0	0	0	37									0	0	0	0
210	27	1	0	0	1	0	0	1	1	0	0	0	0	0	0	0	0		0	1	13	0	1	0	0	1	0	0	1	0	0	0	0	0	0	0										0	0	0	0
3	26	1	0	0	1	0	0	3	0	0	0	0	0	0	0	0	0		0	1	2	0	0	1	0	0	0	1	0	0	0	0	0	0	0	0	38	120	22	98	109	75	162	42	16	0	0	0	0
227	59	1	0	0	1	0	7	0	0	0	1	0	0	0	1	0	0	0	1	1		0	0	1	0	1	0	0	0	0	0	0	0	0	0	0	37									0	0	0	0
340	37	0	0	0	1	1	3	3	0	0	0	0	2	1	1	0	0	1	1	1	1	1	1	0	0	0	0	0	0	0	0	0	0	0	0	0	37									0	0	0	0
331	55	1	0	0	1	0	6	3	0	0	0	0	0	0	1	0	0	0	1	1	1	0	0	0	0	1	0	0	0	0	0	0	1	0	0	0	37									0	0	0	0
257	31	1	0	0	1	0	7	2	1	0	0	0	0	0	1	0	0	1	1	1	1	1	1	0	0	0	0	0	0	0	1	1	1	0	0	0										0	0	0	0
381	22	0	0	0	1	0	8	0	0	0	0	0	0	0	1	0	0	2	1	1	4	1	1	0	0	0	1	0	0	0	0	0	0	0	0	0	38									0	0	0	0
183	24	0	0	0	1	0	7	0	0	0	1	0	0	0	1	0	0	1	1	1	6	0	1	0	0	0	1	0	0	0	0	0	0	0	0	0	37									1	1	1	1
358	36	1	0	0	1	0	6	3	0	0	1	0	0	0	1	0	0	1	1	1	11	0	1	0	0	0	1	0	0	0	0	0	0	0	0	1	37									0	0	0	0
284	21	0	0	0	1	1	7	1	1	0	0	0	0	0	0	0	0		0	1	3	1	0	1	0	0	0	0	0	0	1	0	1	0	0	0										0	0	0	0
417	29	0	0	0	1	0	2	3	0	0	0	0	9	1	0	0	0		0	1	20	1	0	1	0	0	0	1	0	0	0	0	0	0	2	0	38	109	28	87						1	0	0	0
344	40	0	0	0	1	0	6	2	1	0	0	0	0	0	1	0	0		0	0		0	0	0	0	0	0	0	0	0	0	0	0	0	0	0	37									0	0	0	0
217	35	1	0	0	1	0	6	3	0	1	0	0	0	0	1	0	0	1	1	1	3	1	0	0	0	0	0	0	1	0	0	0	0	0	0	0	38									0	0	0	0
310	38	0	0	0	1	4	4	3	0	0	0	0	0	0	0	0	0		0	1	8	0	1	0	0	0	1	1	1	0	0	0	0	0	0	0										0	0	0	0
251	28	1	0	0	1	0	0	2	1	0	0	0	0	0	1	0	0	1	1	0		0	0	0	0	0	0	0	0	0	0	0	0	0	0	0										0	0	0	0
314	28	1	0	0	1	0	8	3	0	0	0	0	2	1	1	0	0	2	1	1	2	1	1	0	0	1	1	0	0	0	1	0	0	0	0	0										0	0	0	0
189	24	1	0	0	1	3	6	1	1	0	0	0	0	0	1	0	0	2	1	1	7	1	1	0	0	0	1	1	0	0	1	0	1	0	0	0										0	0	0	0
265	48	0	1	0	1	0	7	0	0	0	0	0	0	0	0	0	0		0	1	21	0	1	0	0	0	0	0	0	0	0	0	0	0	0	0										0	0	0	0
289	29	1	0	0	1	0	0	3	0	1	0	0	0	0	0	0	0		0	1	1	1	0	0	0	0	0	0	1	0	0	0	1	0	0	0										0	0	0	0
161	31	1	1	0	1	0	0	0	0	0	0	0	0	0	1	0	0	0	1	1	0	0	0	1	0	1	0	0	0	0	0	0	0	0	0	0										1	1	1	0
20	19	0	1	0	1	0	0	3	0	0	0	0	0	0	1	0	0	1	1	0		0	0	0	0	0	0	0	0	0	0	0	0	0	0	0				96						1	1	1	1
325	58	1	0	0	1	0	0	1	1	0	0	0	0	0	0	0	0		0	1	3	0	1	0	0	1	1	0	0	0	0	0	0	0	0	0	37						159			0	0	0	0
156	26	0	0	0	1	0	0	3	0	0	0	0	0	0	0	0	0		0	1	4	1	0	1	0	1	0	0	1	1	0	0	0	0	0	0										1	1	1	0
296	68	1	0	0	1	0	0	3	0	0	0	0	0	0	1	0	0	0	1	1	1	0	1	0	0	0	1	0	1	0	0	0	0	0	0	0										0	0	0	0
374	33	1	0	0	1	1	3	3	0	0	0	0	0	0	1	0	0	2	1	1	4	0	0	0	0	1	1	1	1	0	1	1	0	0	0	0	37									0	0	0	0
157	36	1	0	0	1	4	0	3	0	0	0	0	0	0	1	0	0	1	1	1	2	1	1	0	0	0	1	0	1	0	0	0	0	0	0	0										1	1	1	0
201	27	1	0	0	1	0	0	3	0	0	0	0	0	0	0	0	0		0	1	1	0	1	0	0	1	1	0	0	0	0	0	0	0	0	0	37									1	1	1	0
242	36	0	0	0	1	0	2	3	0	0	0	0	9	1	1	0	0	1	1	1	1	1	1	0	0	0	0	0	1	0	0	0	0	0	0	0	37									0	0	0	0
316	34	0	0	0	1	0	0	3	0	0	0	0	0	0	1	0	0	1	1	1	10	0	0	0	0	1	0	0	1	0	0	0	1	0	0	0										0	0	0	0
66	24	1	0	0	1	0	2	3	0	0	0	0	0	0	1	0	0	1	1	1	11	1	0	1	0	1	1	0	1	0	1	0	0	0	0	0										1	1	0	1
308	23	1	0	0	1	0	6	3	0	0	0	0	0	0	1	0	0	1	1	1	10	0	1	0	0	0	1	0	1	0	0	0	0	0	0	0										0	0	0	0
219	27	1	0	0	1	0	6	3	0	0	0	0	0	0	1	0	0	1	1	1	2	0	0	0	0	0	1	0	1	0	0	0	0	0	0	0										0	0	0	0
268	35	1	0	0	1	4	3	3	0	0	0	0	2	1	1	0	0	1	1	0		0	0	0	0	0	0	0	0	0	0	0	0	0	0	0										0	0	0	0
192	27	1	0	0	1	0	3	0	0	0	0	0	2	1	1	0	0	1	1	1		0	0	0	0	0	1	0	0	0	1	0	0	0	0	0	37									0	0	0	0
420	69	1	0	0	1	0	7	1	1	0	0	0	0	0	0	0	0		0	1	3	1	1	0	0	1	0	1	0	0	0	0	0	0	0	0	40	112	22	95	125	71	150	59		1	0	0	0
359	39	0	0	0	1	0	3	3	0	0	0	0	2	1	1	0	0	1	1	1	2	0	0	1	0	1	1	0	1	0	0	0	0	0	0	0	37									0	0	0	0
404	28	0	0	0	1	0	1	1	1	0	0	0	7	1	0	0	0		0	0	0	0	0	0	0	0	0	0	0	0	0	0	0	0	0	0	38	150	20							0	0	0	0
41	58	1	0	0	1	0	0	1	1	0	0	0	0	0	1	0	0	1	1	1	2	1	1	0	0	1	1	1	0	0	0	0	0	0	0	0	37	92		97						0	0	0	0
105	23	1	1	0	1	0	7	0	0	0	0	0	7	1	0	0	0		0	1	3	1	1	1	0	0	0	1	0	0	1	1	0	0	0	1	37	106		100						0	0	0	0
244	27	0	0	0	1	0	8	3	0	0	0	0	0	0	1	0	0	1	1	1	8	0	0	1	0	0	0	0	1	0	0	1	0	0	0	0	37									0	0	0	0
43	29	1	0	0	1	0	0	3	0	0	0	0	2	1	1	0	0	1	1	1	1	0	1	0	0	0	1	0	0	0	0	0	0	0	0	0										0	0	0	0
236	24	0	0	0	1	0	2	2	1	0	0	0	0	0	0	0	0		0	1	2	0	1	0	0	0	0	0	1	0	1	0	0	0	0	0	36									0	0	0	0
127	35	1	0	0	1	0	6	2	1	0	0	0	0	0	0	0	0		0	1	1	1	0	0	0	0	0	1	0	0	0	0	0	0	0	0	38	120	20	97	118	76				0	0	0	0
299	30	1	0	0	1	1	1	2	1	0	0	0	7	1	0	0	0		0	1	2	1	0	0	0	1	0	1	0	0	0	0	0	0	0	0										1	1	1	0
47	39	0	0	0	1	2	0	3	0	0	0	0	0	0	1	0	0	1	1	1	1	0	1	0	0	0	0	0	0	0	0	0	0	0	0	0										1	1	1	0
291	35	1	0	0	1	0	0	3	0	0	0	0	0	0	1	0	0	1	1	1	1	0	0	0	0	0	1	0	1	0	0	0	0	0	0	0										0	0	0	0
360	16	0	0	0	1	0	8	3	0	0	0	0	0	0	1	0	0	0	1	0		0	0	0	0	0	0	0	0	0	0	0	0	0	0	0	37									0	0	0	0
70	47	1	0	0	1	0	0	3	0	0	0	0	0	0	1	0	0	1	1	1		1	0	1	0	0	1	1	1	1	1	1	0	0	0	0										1	1	1	1
343	28	0	0	0	1	0	4	3	0	0	0	0	0	0	0	0	0		0	1	6	1	1	0	0	0	1	0	1	0	0	0	0	0	0	0	37									0	0	0	0
327	27	1	0	0	1	0	5	0	0	0	0	0	0	0	1	0	0	1	1	1	4	1	1	0	0	0	1	0	0	0	0	0	0	0	0	0										0	0	0	0
324	32	1	0	0	1	0	3	3	0	0	0	0	2	1	1	0	0	1	1	1	10	1	1	0	0	1	1	0	1	0	0	0	0	0	0	0										0	0	0	0
409	95	1	0	0	1	0	2	3	0	0	0	0	0	0	0	0	0		0	1	2	1	0	1	0	0	0	0	0	0	0	1	0	0	0	0	38	72	18							1	0	0	0
31	24	0	0	0	1	0	0	3	0	0	0	0	0	0	1	0	0	1	1	1		0	1	0	0	0	1	0	0	0	0	0	0	0	0	0										0	0	0	0
90	47	1	0	0	1	0	4	3	0	1	1	0	0	0	1	0	0	2	1	1	3	0	1	0	0	1	1	0	1	1	1	1	0	0	0	0	37	88		98						1	1	1	0
7	45	1	0	0	1	0	0	3	0	0	0	0	0	0	0	0	0		0	1		1	0	1	0	0	0	1	0	0	0	0	0	0	0	0	38	74	20	96	133	86				1	1	1	1
260	41	0	0	0	1	0	5	2	1	0	0	0	0	0	1	0	0	1	1	1		0	0	0	0	1	0	0	1	0	0	0	0	0	0	0										0	0	0	0
57	34	1	0	0	1	0	0	3	0	0	0	0	0	0	0	0	0		0	1	6	0	0	0	0	0	0	0	0	0	0	1	1	1	0	0	37	114		97						0	0	0	0
342	32	1	0	0	1	0	1	2	1	0	0	0	7	1	1	0	0		0	1	2	1	0	0	0	1	0	0	0	0	1	0	1	0	0	0	37									0	0	0	0
229	32	1	0	0	1	0	2	3	0	0	0	0	0	0	1	0	0		0	1	1	1	0	0	0	0	0	0	0	0	0	0	0	0	0	0	38									0	0	0	0
160	43	1	0	0	1	0	5	3	0	1	0	0	6	1	0	0	0		0	1	1	0	0	1	0	0	1	0	0	0	0	0	0	0	0	0										1	1	1	0
101	43	0	0	0	1	0	0	3	0	0	0	0	8	1	0	0	0		0	1	3	1	1	0	0	0	0	1	0	0	0	0	0	0	0	0	37	82		98						0	0	0	0
328	20	0	0	0	1	0	7	3	0	0	0	0	0	0	0	0	0		0	1	4	1	1	1	0	0	0	0	0	0	0	0	0	0	0	0	37									0	0	0	0
64	19	1	0	0	1	0	7	3	0	0	0	0	0	0	0	0	0		0	1		1	0	0	0	1	1	1	1	0	0	1	0	0	0	0										1	1	1	1
393	28	1	0	0	1	0	4	3	0	1	1	0	0	0	1	0	0	1	1	1	13	0	1	0	0	1	0	0	0	0	1	0	0	0	0	0										1	1	1	0
143	51	0	0	0	1	0	4	3	0	0	0	0	0	0	0	0	0		0	1	1	1	0	0	0	0	0	1	0	0	0	0	0	0	0	0	37	80		99						0	0	0	0
376	26	1	0	0	1	0	3	3	0	0	0	0	0	0	1	0	0	1	1	1	4	0	1	1	0	1	0	0	0	0	1	0	0	0	0	0	37									0	0	0	0
140	33	0	0	0	1	4	0	3	0	0	0	0	0	0	0	0	0		0	1	37	0	1	0	1	0	1	0	1	0	0	0	0	0	0	0	37	106		97						0	0	0	0
30	32	1	0	0	1	0	0	3	0	0	0	0	5	1	1	0	0	2	1	1	6	0	1	0	0	0	1	1	0	0	0	0	0	0	0	0										0	0	0	0
129	37	1	0	0	1	0	0	3	0	0	0	0	0	0	0	0	0		0	1	4	0	1	0	0	0	0	0	0	0	0	0	0	0	0	0	37	98		98						1	1	1	0
371	48	1	0	0	1	0	6	3	0	0	1	0	0	0	1	0	0	2	1	1	2	0	0	0	0	1	1	0	1	0	0	0	0	0	0	0	37									0	0	0	0
89	22	0	0	0	1	0	0	2	1	1	0	0	0	0	0	0	0		0	1	8	0	0	1	0	1	1	0	0	0	0	0	1	0	0	0	37	84		99						0	0	0	0
73	30	0	0	0	1	0	5	2	1	0	0	0	0	0	1	0	0		0	1	3	1	0	0	0	0	1	1	0	0	0	1	0	0	0	0	36	106		99						1	1	1	1
74	44	1	0	0	1	0	5	3	0	0	0	0	0	0	1	0	0	1	1	1	5	0	0	0	0	0	1	0	1	0	1	0	1	0	0	0	37	88		97						1	1	1	1
293	46	1	0	1	0	0	5	3	0	0	0	0	0	0	1	0	0	2	1	1	7	0	1	0	0	1	1	1	1	0	0	0	0	0	0	0										0	0	0	0
319	53	1	0	0	1	0	0	3	0	0	1	0	0	0	0	0	0		0	1	2	1	0	0	0	0	0	0	0	1	1	0	0	0	0	0										0	0	0	0
406	82	0	0	0	1	0	2	3	0	0	0	0	6	1	0	0	0		0	1	3	1	0	0	0	0	0	1	0	0	0	0	0	0	0	0	38	86	24	84	110	60				1	0	0	0
395	24	1	0	0	1	0	0	1	1	0	0	0	0	0	0	0	0		0	1	3	1	1	0	0	1	0	1	0	0	0	0	1	0	2	0	39	116	46	93						1	0	0	0
80	48	0	0	1	0	0	7	3	0	0	0	0	0	0	1	0	0	1	1	1	3	0	0	1	0	0	0	0	0	0	0	0	1	0	0	0	37	101		97						0	0	0	0
367	22	1	0	0	1	0	8	3	0	0	0	0	0	0	1	0	0	0	1	1	4	0	0	0	0	1	1	1	0	0	0	0	0	0	0	0	37									0	0	0	0
379	20	1	0	0	1	0	8	3	0	0	0	0	0	0	1	0	0		0	1	3	0	1	0	0	0	1	0	1	0	1	0	1	0	0	0	37									0	0	0	0
16	43	1	0	0	1	0	0	1	1	0	0	0	0	0	1	0	0		0	1	3	1	1	0	0	0	1	1	0	0	0	0	0	0	0	0				97						1	1	1	0
415	49	1	0	0	1	0	0	1	1	0	0	0	0	0	0	0	0		0	1	7	0	1	0	1	1	0	1	0	0	0	0	0	0	0	0	38	109	24	94	153	86	160	84		1	0	0	0
111	32	1	0	0	1	0	3	0	0	0	0	0	2	1	1	0	0	1	1	1	1	0	0	0	0	1	1	1	1	0	0	0	0	0	0	0	37	78		99						0	0	0	0
394	56	0	0	0	1	0	0	2	1	0	0	0	0	0	0	0	0		0	1		0	1	0	0	1	0	0	1	0	0	0	1	0	0	0										0	0	0	0
85	18	0	0	0	1	1	8	3	0	1	0	0	0	0	0	0	0		0	1	3	0	1	1	0	0	0	1	0	0	0	0	0	0	0	0	37	98		100						0	0	0	0
117	34	0	0	0	1	0	5	3	0	0	0	0	0	0	1	0	0	1	1	1	3	1	1	1	0	1	1	0	0	0	1	1	1	1	0	0	37									1	1	1	0
87	46	1	0	0	1	0	3	3	0	0	0	0	2	1	1	0	0	1	1	1	2	0	0	0	0	0	0	1	0	0	0	0	0	0	0	0	37	85		97						0	0	0	0
62	70	0	0	0	1	0	0	1	1	0	0	0	0	0	0	0	0		0	1		1	0	0	0	0	0	0	0	0	0	0	0	0	0	0	38	104		97						0	0	0	0
115	58	1	0	0	1	0	0	1	1	0	0	0	0	0	0	0	0		0	1	17	1	0	1	0	0	1	0	0	0	0	0	0	0	0	0	37	80		98						0	0	0	0
155	26	1	0	0	1	0	7	0	0	0	0	0	0	0	0	0	0		0	1	6	1	0	0	0	1	1	0	0	0	0	0	0	0	0	0										0	0	0	0
273	31	1	0	0	1	4	1	2	1	0	0	0	7	1	0	0	0		0	1		1	0	0	0	0	1	0	0	0	0	0	1	0	0	0										0	0	0	0
94	32	1	0	0	1	0	1	2	1	0	0	0	7	1	0	0	0		0	1	1	1	0	1	0	0	1	1	1	0	0	0	0	0	0	0	39	118		98						1	1	1	0
235	74	0	0	0	1	0	0	3	0	0	0	0	9	1	0	0	0		0	1	1	1	0	0	0	0	1	0	0	0	0	0	0	0	0	0	38									0	0	0	0
92	29	1	0	0	1	4	0	3	0	0	0	0	0	0	1	0	0		0	1	9	0	1	0	0	0	0	0	1	0	1	0	0	0	0	0	37	88		99						0	0	0	0
56	30	1	0	0	1	0	0	1	1	0	1	0	0	0	0	0	0		0	1	3	1	0	0	0	1	0	1	0	0	1	0	0	0	0	0	38	124								0	0	0	0
68	25	1	0	0	1	0	6	3	0	0	0	0	0	0	0	0	0		0	1		0	0	0	0	0	1	0	0	0	0	0	0	0	0	0	37	75		99						0	0	0	0
170	26	1	0	0	1	1	6	3	0	0	0	0	0	0	1	0	0	1	1	1		1	0	1	0	0	0	0	1	0	1	0	1	0	0	0										0	0	0	0
254	31	0	0	0	1	1	7	2	1	0	0	0	0	0	1	0	0		0	0		0	0	0	0	0	0	0	0	0	0	0	0	0	0	0										0	0	0	0
256	34	0	0	0	1	0	7	0	0	0	0	0	0	0	1	0	0	1	1	1	8	0	0	0	0	0	0	0	0	0	0	0	1	0	0	0										0	0	0	0
98	39	1	0	0	1	0	1	2	1	0	0	0	7	1	1	0	0	1	1	1	5	0	1	0	0	1	1	0	0	0	0	0	0	0	0	0	37	102		99						1	1	1	0
119	40	0	0	0	1	0	5	3	0	0	0	0	0	0	0	0	0		0	1	14	1	1	0	0	1	0	0	1	0	0	1	0	0	0	0										0	0	0	0
243	26	1	0	0	1	0	7	3	0	0	1	0	0	0	0	0	0		0	1	3	0	1	0	0	1	1	0	0	0	0	0	0	0	0	0	37									0	0	0	0
341	38	0	0	0	1	4	4	3	0	0	0	0	0	0	0	0	0		0	1	2	1	0	1	0	0	0	0	1	0	1	1	0	0	0	0	38									0	0	0	0
102	45	1	0	0	1	4	1	1	1	0	0	0	7	1	0	0	0		0	1	7	0	0	0	0	1	0	0	0	0	0	0	0	0	0	0	37	98		100						1	1	1	1
249	32	1	0	0	1	0	7	2	1	0	0	0	0	0	1	0	0	1	1	1	5	0	0	0	0	0	0	0	0	0	1	1	0	0	0	0										0	0	0	0
199	30	0	0	0	1	1	5	0	0	0	0	0	6	1	0	0	0		0	1	6	1	1	0	0	1	1	1	1	0	0	1	1	0	0	0										0	0	0	0
196	42	0	1	0	1	0	0	3	0	0	0	0	0	0	0	0	0		0	0	0	0	0	0	0	0	0	0	0	0	0	0	0	0	0	0										0	0	0	0
398	33	0	0	0	1	0	4	3	0	0	0	0	0	0	0	0	0		0	1	7	1	1	0	0	0	0	1	0	1	1	0	1	0	0	0	39	98	22		114	81	165	60		0	0	0	0
197	30	0	1	0	1	0	5	3	0	0	0	0	0	0	0	0	0		0	0	0	0	0	0	0	0	0	0	0	0	0	0	0	0	0	0										0	0	0	0
228	28	0	0	0	1	0	6	3	0	0	0	0	0	0	1	0	0		0	1		0	1	0	0	1	0	0	0	0	0	0	0	0	0	0										0	0	0	0
349	32	1	0	0	1	4	3	3	0	0	0	0	0	0	1	0	0	1	1	1	7	0	1	0	0	0	1	0	0	0	0	0	0	0	0	0	37									0	0	0	0
355	15	0	0	0	1	0	8	3	0	0	0	0	0	0	1	0	0	0	1	1	2	0	1	1	0	0	0	0	0	0	0	0	0	0	0	0	37									0	0	0	0
109	47	1	0	0	1	0	3	3	0	0	0	0	2	1	1	0	0	1	1	1	3	0	0	0	0	0	0	1	0	0	0	0	0	0	0	0	37	93		98						0	0	0	0
110	36	0	0	0	1	0	5	3	0	0	0	0	0	0	1	0	0	1	1	1	3	0	1	0	0	0	1	1	0	0	0	0	0	0	0	0	37	74		99						0	0	0	0
233	41	0	1	0	1	0	2	0	0	0	0	0	0	0	0	0	0		0	1	1	1	1	0	0	0	0	1	0	0	0	0	0	0	0	0	39									0	0	0	0
204	61	0	0	0	1	0	4	3	0	0	1	0	0	0	0	0	0		0	1	4	0	1	0	0	1	1	0	0	0	0	0	0	0	0	0	37									0	0	0	0
297	44	1	0	0	1	0	0	3	0	0	0	0	0	0	1	0	0	1	1	1	1	0	0	0	0	0	1	0	0	0	0	0	0	0	0	0										0	0	0	0
232	29	1	0	0	1	0	6	3	0	0	0	0	0	0	1	0	0		0	1	3	1	1	0	0	0	1	0	0	0	0	0	0	0	0	0										0	0	0	0
361	55	1	0	0	1	0	0	1	1	0	0	0	3	1	1	0	0	1	1	1	4	0	1	0	0	0	1	1	1	0	0	0	0	0	0	0	37									0	0	0	0
193	49	0	0	0	1	0	4	0	0	0	1	0	0	0	0	0	0		0	1	4	0	1	0	0	1	1	0	0	0	0	0	0	0	0	0	37									0	0	0	0
18	28	1	0	0	1	4	0	3	0	0	1	0	0	0	0	0	0		0	1	17	1	0	1	0	0	1	1	0	0	1	1	0	0	0	0	37	100		99						1	1	1	1
12	18	1	1	0	1	0	0	3	0	1	0	0	0	0	1	0	0	2	1	1	10	0	0	0	0	1	1	0	1	1	1	0	0	0	0	0	38			99						0	0	0	0
24	30	0	0	1	0	4	7	1	1	0	0	0	0	0	1	0	0	1	1	1	2	0	1	0	0	1	1	0	0	0	0	0	0	0	0	0										0	0	0	0
173	20	0	0	0	1	0	0	0	0	0	0	0	0	0	1	0	0	0	1	1	7	1	1	0	0	1	1	0	0	0	0	0	0	0	0	0										0	0	0	0
281	21	1	0	0	1	0	8	3	0	0	0	0	0	0	1	0	0	2	1	1	1	1	1	0	0	0	1	0	0	0	0	0	0	0	0	0										0	0	0	0
121	39	0	0	1	0	0	6	3	0	1	0	0	0	0	0	0	0		0	1	1	0	0	0	0	0	0	1	0	0	0	0	0	0	0	0	37	82		97						0	0	0	0
106	23	1	0	0	1	0	0	3	0	0	0	0	2	1	1	0	0	2	1	1	17	0	0	0	0	1	1	0	0	0	0	0	0	1	0	0	36	86		99						0	0	0	0
113	28	0	0	0	1	0	0	3	0	0	0	0	0	0	1	0	0	0	1	1	1	0	0	0	0	0	1	0	0	0	0	0	0	0	0	0	37	80		97						0	0	0	0
172	18	1	0	0	1	0	0	0	0	0	0	0	0	0	1	0	0	0	1	1	16	1	0	0	0	0	0	0	1	0	0	0	0	0	0	0										0	0	0	0
136	25	1	0	0	1	0	2	3	0	0	0	0	9	1	0	0	0		0	1	11	1	1	0	0	1	1	1	1	0	0	0	0	0	0	0	37	102		99						0	0	0	0
353	32	0	0	0	1	0	0	3	0	0	0	0	0	0	0	0	0		0	1	7	0	1	0	0	1	0	1	0	0	0	0	0	0	0	0										1	1	0	1
139	34	1	0	0	1	0	0	2	1	0	0	0	0	0	1	0	0		0	0		0	0	0	0	0	0	0	0	0	0	0	0	0	0	0	37	110		98						0	0	0	0
125	21	0	0	0	1	0	8	3	0	0	0	0	0	0	1	0	0		0	1	1	0	1	0	0	0	0	0	0	0	0	0	0	0	0	0	37	53		100						0	0	0	0
82	65	0	0	0	1	0	0	3	0	0	0	0	5	1	1	0	0	1	1	1	1	0	1	0	0	1	0	0	0	0	0	0	0	0	0	0	37	97		98						0	0	0	0
282	27	1	0	0	1	0	6	3	0	0	0	0	0	0	1	0	0	1	1	1	7	1	1	0	0	0	1	0	0	0	0	0	0	0	0	0										0	0	0	0
177	23	1	0	0	1	2	8	0	0	1	0	0	0	0	0	0	0		0	1	6	1	0	1	0	0	1	0	0	0	0	0	0	0	0	0										1	1	1	0
149	20	0	0	0	1	0	0	3	0	0	0	0	6	1	0	0	0		0	1	2	1	0	0	0	0	0	1	1	0	0	0	1	0	0	0	39			98						0	0	0	0
346	32	0	0	0	1	5	6	2	1	0	0	0	0	0	1	0	0		0	1	2	0	1	0	0	0	1	0	0	0	0	0	0	0	0	0	37									0	0	0	0
69	47	0	0	0	1	0	6	3	0	0	0	0	0	0	0	0	0		0	1	1	1	0	1	0	1	1	0	1	0	0	0	0	0	0	0										0	0	0	0
286	29	1	0	0	1	2	8	3	0	0	0	0	0	0	0	0	0		0	1	1	1	1	0	0	1	0	0	0	1	1	0	0	0	0	0										0	0	0	0
174	47	0	0	0	1	0	7	0	0	1	0	0	0	0	0	0	0		0	1		1	1	0	0	0	1	0	0	0	0	0	1	0	0	0										0	0	0	0
239	60	0	0	0	1	0	0	3	0	0	0	0	0	0	1	0	0	0	1	1	2	0	0	1	0	1	0	0	0	0	0	0	0	0	0	0	37									0	0	0	0
103	67	1	0	0	1	5	8	3	0	0	0	0	0	0	0	0	0		0	1		0	1	0	0	0	0	1	0	0	0	1	0	0	0	1	36	111		98						0	0	0	0
292	40	0	0	0	1	0	0	3	0	0	0	0	0	0	1	0	0	1	1	1	2	1	1	0	0	1	1	1	0	0	0	0	0	0	0	0										0	0	0	0
222	29	0	1	1	0	0	0	0	0	0	0	0	2	1	0	0	0		0	1	6	1	1	0	0	0	1	0	1	0	0	0	0	0	0	0										1	1	1	0
116	37	1	0	0	1	0	4	3	0	1	0	0	0	0	0	0	0		0	1	2	1	1	0	0	0	1	0	0	1	1	1	1	0	0	0	37	117		98						1	1	1	0
225	29	1	0	0	1	0	3	0	0	0	0	0	2	1	1	0	0		0	1	1	1	0	0	0	1	0	0	0	0	1	0	0	0	0	0	38									0	0	0	0
8	37	0	0	0	1	0	0	2	1	0	0	0	0	0	1	0	0	1	1	1	1	1	0	0	0	0	0	0	1	0	0	0	0	0	0	0	37	110		95						0	0	0	0
118	29	1	0	0	1	5	1	2	1	0	0	0	7	1	0	0	0		0	1	5	0	1	1	0	1	0	0	0	0	0	0	0	0	0	0	37	82		98						0	0	0	0
163	32	1	0	0	1	0	5	1	1	0	0	0	0	0	1	0	0	0	1	1		1	0	0	0	0	0	0	0	0	0	0	0	0	0	0										1	1	1	0
335	28	1	0	0	1	3	4	3	0	0	1	0	0	0	1	0	0	1	1	1	4	0	0	0	0	0	1	1	0	0	0	0	0	0	0	0	37									0	0	0	0
375	29	0	0	0	1	0	6	3	0	0	1	0	0	0	1	0	0	2	1	1	10	0	1	1	1	0	1	0	1	0	1	1	0	0	0	0	37									0	0	0	0
88	24	1	0	0	1	0	0	3	0	0	0	0	6	1	1	0	0	2	1	1	4	0	1	0	0	1	1	0	0	0	0	0	0	0	0	0	37	109		97						0	0	0	0
75	54	1	0	0	1	0	2	1	1	0	0	0	0	0	1	0	0	1	1	1	11	1	0	0	0	1	0	0	0	0	1	0	0	0	0	0	37	82		96						1	1	1	1
49	43	0	0	0	1	0	0	1	1	0	0	0	0	0	1	0	0	1	1	1	7	1	1	0	0	0	0	1	0	0	0	0	0	0	0	1										1	1	1	0
214	61	1	0	0	1	0	0	1	1	0	0	0	0	0	0	0	0		0	1	1	1	0	0	0	0	0	0	0	0	0	0	0	0	0	0										0	0	0	0
58	30	0	0	0	1	0	0	3	0	0	0	0	2	1	1	0	0	0	1	1	4	1	0	0	0	1	1	1	1	0	1	0	1	0	0	0										0	0	0	0
365	41	1	0	0	1	0	7	3	0	0	0	0	0	0	1	0	0	1	1	1	8	0	1	0	0	1	1	1	1	0	1	0	0	0	0	0	37									0	0	0	0
309	19	0	0	0	1	0	8	3	0	0	0	0	2	1	1	0	0	2	1	1	13	1	0	1	0	1	0	0	1	0	0	0	0	0	0	0										0	0	0	0
356	33	0	0	2	0	0	6	2	1	0	0	0	0	0	1	0	0	0	1	1	4	0	1	0	0	1	1	0	0	0	1	0	0	0	0	0	37									0	0	0	0
135	52	1	0	0	1	0	7	2	1	0	0	0	8	1	0	0	0		0	1	22	1	1	0	0	1	1	0	1	0	0	0	0	0	0	1	36	87		99						0	0	0	0
144	25	0	0	0	1	0	0	0	0	0	0	0	0	0	1	0	0	0	1	1	3	0	0	0	0	1	0	0	1	0	0	0	0	0	0	0	37	110		99						0	0	0	0
152	38	0	0	0	1	0	7	2	1	0	0	0	0	0	1	0	0	2	1	1	1	0	0	0	0	1	0	0	0	0	0	0	0	0	0	0										0	0	0	0
305	39	1	0	0	1	0	3	3	0	0	0	0	0	0	1	0	0	1	1	1	1	0	1	0	0	0	0	1	0	0	0	0	0	0	0	0										0	0	0	0
329	35	1	0	0	1	0	6	3	0	0	0	0	0	0	0	0	0		0	1	2	1	1	0	0	0	0	1	1	0	0	0	0	0	0	0	38									1	1	1	0
95	41	1	0	0	1	0	1	3	0	0	0	0	0	0	0	0	0		0	1	2	0	0	0	0	1	0	0	0	0	0	1	0	0	0	0	36	94		96						0	0	0	0
14	37	1	0	0	1	0	0	3	0	0	0	0	0	0	1	0	0	1	1	1	2	0	1	0	0	0	1	1	0	0	0	0	0	0	0	0				95						0	0	0	0
320	31	1	0	0	1	0	6	3	0	0	0	0	0	0	1	0	0	1	1	1	3	0	0	0	0	0	1	1	1	0	0	0	0	0	0	0										0	0	0	0
128	24	0	0	0	1	0	0	3	0	0	0	0	0	0	1	0	0	0	1	1	3	0	1	0	0	0	0	1	0	0	0	0	1	0	0	0	37	88		99						1	1	1	0
318	48	1	0	0	1	0	0	3	0	0	0	0	0	0	1	0	0	1	1	1	1	0	0	1	0	0	0	1	0	0	0	1	0	0	0	0										0	0	0	0
83	26	0	0	0	1	1	5	3	0	0	0	0	0	0	1	0	0	1	1	1	10	0	1	0	0	1	0	0	0	0	0	0	0	0	0	0	37	100		97						0	0	0	0
396	40	0	0	0	1	1	2	3	0	0	0	0	9	1	0	0	0		0	1	4	1	1	0	0	0	0	0	0	0	0	0	0	0	0	0										1	1	1	0
362	39	1	0	2	0	0	3	3	0	0	0	0	2	1	1	0	0	1	1	1	2	0	1	0	0	1	0	0	1	0	0	0	0	0	0	0	37									0	0	0	0
302	22	0	0	0	1	1	8	3	0	0	0	0	2	1	1	0	0	2	1	1	10	1	1	0	0	1	1	0	1	0	1	0	0	0	0	0										0	0	0	0
122	33	1	0	0	1	0	5	3	0	0	0	0	0	0	1	0	0	2	1	1	1	1	1	0	0	0	0	1	0	0	0	0	0	0	0	0	37	94	20	98						0	0	0	0
142	32	1	0	0	1	0	8	3	0	0	0	0	0	0	1	0	0	1	1	1	13	1	1	0	0	1	1	1	1	1	1	0	0	0	0	0	37	108		100						1	1	1	1
345	30	0	0	0	1	0	6	2	1	0	0	0	0	0	1	0	0		0	1		0	1	0	0	0	0	0	0	0	0	0	0	0	0	0	37									0	0	0	0
399	83	1	0	0	1	0	7	1	1	0	0	1	0	0	0	0	0		0	1	2	1	1	0	0	0	0	1	0	0	0	0	0	0	0	0	37	100	34	98	148	70				1	0	0	0
246	39	1	0	0	1	0	0	1	1	0	0	0	0	0	1	0	0	1	1	1	4	0	0	0	0	1	0	0	0	0	0	0	0	0	0	0										0	0	0	0
300	37	1	0	0	1	0	0	3	0	0	0	0	0	0	1	0	0	1	1	1		0	1	0	0	1	0	0	0	0	0	0	0	0	0	0										0	0	0	0
212	43	1	0	0	1	0	0	3	0	0	0	0	0	0	1	0	0	1	1	1		0	0	0	0	0	0	0	1	0	0	0	0	0	0	0										0	0	0	0
9	29	0	0	0	1	0	0	3	0	0	1	0	0	0	1	0	0	0	1	1	2	1	0	0	0	0	1	0	1	0	0	0	0	0	0	0	37	104		97						1	1	1	0
221	41	1	0	0	1	0	4	2	1	0	1	0	0	0	0	0	0		0	1	1	1	1	0	0	0	0	0	0	0	1	0	0	0	0	0										0	0	0	0
247	37	1	0	0	1	1	0	2	1	0	0	0	0	0	1	0	0	1	1	1	1	0	1	0	0	0	1	0	0	0	1	0	0	0	0	0										0	0	0	0
25	24	1	0	0	1	5	3	3	0	0	0	0	2	1	1	0	0		0	1	3	1	1	0	1	0	1	0	1	0	0	0	0	0	0	0										0	0	0	0
100	35	0	0	0	1	1	0	3	0	0	0	0	2	1	1	0	0		0	1	4	1	1	1	0	0	0	1	0	0	0	0	0	0	0	0	37	62		96						1	1	1	0
51	46	1	0	0	1	0	3	3	0	0	0	0	2	1	0	0	0		0	1	13	1	1	1	0	1	1	0	0	0	1	1	0	0	0	0	37	90		98						0	0	0	0
153	64	1	0	0	1	0	0	3	0	0	0	0	0	0	1	0	0	2	1	1		0	0	0	0	0	0	0	1	0	0	0	0	0	0	0										0	0	0	0
132	27	0	0	0	1	0	8	3	0	1	0	0	0	0	1	0	0	2	1	1	4	0	0	0	0	0	1	0	0	0	1	0	1	0	0	0	37	100		97						0	0	0	0
380	33	1	0	0	1	2	7	1	1	0	0	0	0	0	1	0	0	1	1	1	4	1	1	0	0	0	1	1	1	0	1	0	0	0	0	0	37									0	0	0	0
130	53	0	0	0	1	0	0	3	0	0	0	0	3	1	1	0	0	2	1	1	3	1	0	0	0	0	1	1	0	0	0	1	0	0	0	0	37	109		98						1	1	1	0
418	47	0	0	0	1	0	0	2	1	0	0	0	0	0	0	0	0		0	0		0	0	0	0	0	0	0	0	0	0	0	0	0	2	0	38	109	20	96	129	80	162	62		0	0	0	0
175	24	1	0	0	1	0	0	1	1	0	1	0	0	0	0	0	0		0	1	7	1	1	0	0	1	0	0	0	0	1	0	0	0	0	0	37									0	0	0	0
385	29	1	0	0	1	0	5	3	0	0	0	0	0	0	1	0	0	2	1	1	1	0	1	0	0	0	1	0	1	0	0	0	1	0	0	0	37									0	0	0	0
407	78	1	0	1	0	0	0	1	1	0	0	0	0	0	1	0	0	1	1	1	2	1	1	0	0	0	0	1	0	0	0	0	1	0	0	0										1	0	0	0
264	45	0	0	0	1	0	5	3	0	0	0	0	0	0	1	0	0	1	1	1	2	0	1	0	0	1	1	0	1	0	0	0	0	0	0	0										0	0	0	0
2	38	1	0	0	1	0	0	1	1	0	0	0	0	0	1	0	0	0	1	1		0	1	0	0	1	1	1	0	0	0	0	0	0	0	0	36	104		97						0	0	0	0
290	26	1	0	0	1	0	8	3	0	1	0	0	0	0	0	0	0		0	1	5	0	1	0	0	1	1	1	0	0	0	0	0	0	0	0										0	0	0	0
202	29	1	0	0	1	0	3	3	0	0	1	0	2	1	0	0	0		0	1	2	1	0	1	0	0	1	0	1	0	1	1	0	0	0	0										0	0	0	0
191	28	1	0	0	1	0	0	3	0	0	0	0	2	1	0	0	0		0	1	3	1	0	0	0	0	0	0	1	0	0	0	0	0	0	0	37									0	0	0	0
220	25	1	0	0	1	5	7	3	0	0	0	0	0	0	1	0	0	1	1	1	3	1	1	0	0	0	1	1	0	0	0	0	0	0	0	0										0	0	0	0
21	49	0	0	0	1	0	5	3	0	0	0	0	0	0	1	0	0	0	1	0		0	0	0	0	0	0	0	0	0	0	0	0	0	0	0										0	0	0	0
184	22	1	0	0	1	0	0	0	0	0	0	0	0	0	1	0	0	0	1	0	0	0	0	0	0	0	0	0	0	0	0	0	0	0	0	0	37									0	0	0	0
390	71	0	1	1	0	0	0	0	0	0	1	0	0	0	0	0	0		0	1	10	1	1	0	0	1	1	1	0	0	1	0	0	0	0	0	37									0	0	0	0
29	24	1	0	0	1	0	0	0	0	0	0	0	0	0	1	0	0	1	1	1	2	0	0	0	0	0	1	0	0	0	1	0	0	0	0	0	37			99						0	0	0	0
186	53	1	0	0	1	0	6	0	0	0	0	0	0	0	1	0	0	0	1	1		0	1	0	0	0	0	0	1	0	0	0	0	0	0	0	37									0	0	0	0
179	34	0	0	0	1	0	3	0	0	0	0	0	2	1	1	0	0	1	1	1	7	0	0	1	0	0	1	0	1	0	0	0	0	0	0	0										1	1	1	1
402	42	1	0	0	1	0	0	3	0	0	0	0	0	0	1	0	0	1	1	1	9	1	1	0	0	0	0	1	1	0	0	0	0	0	0	0	37	65	18		110	70				0	0	0	0
269	19	0	0	0	1	0	3	3	0	0	0	0	2	1	1	0	0	1	1	1	2	1	0	0	0	0	1	0	0	0	0	0	0	0	0	0										0	0	0	0
167	38	1	0	0	1	0	3	3	0	0	0	0	2	1	1	0	0	1	1	1		0	1	0	0	0	0	0	0	0	0	0	0	0	0	0	36									0	0	0	0
215	41	1	0	0	1	0	3	3	0	0	0	0	2	1	1	0	0	1	1	1	7	1	0	1	0	1	0	0	0	0	0	0	0	0	0	0	37									0	0	0	0
147	50	1	0	0	1	0	0	3	0	0	0	0	0	0	1	0	0	0	1	1		0	1	0	0	0	0	0	0	0	0	0	0	0	0	0		76		97						1	1	1	0
250	31	1	0	0	1	0	5	2	1	0	0	0	0	0	1	0	0	1	1	0		0	0	0	0	0	0	0	0	0	0	0	0	0	0	0										0	0	0	0
389	26	0	0	0	1	0	3	3	0	0	0	0	2	1	1	0	0	1	1	1	1	1	0	0	0	0	0	0	0	0	0	0	0	0	0	0	39									0	0	0	0
53	33	1	0	0	1	0	0	3	0	0	0	0	1	1	1	0	0	2	1	1		1	0	1	0	1	1	1	1	0	1	1	0	0	0	0	37	80		96						0	0	0	0
278	38	0	0	0	1	0	0	3	0	0	0	0	0	0	1	0	0	1	1	1	1	0	0	0	0	0	0	0	0	0	0	0	0	0	0	0										0	0	0	0
405	50	0	0	0	1	0	2	3	0	0	0	0	0	0	0	0	0		0	1	5	1	1	1	1	0	0	1	1	0	0	0	0	0	2	0	38	130		87	84	57				1	0	0	0
166	42	1	0	0	1	0	3	3	0	0	0	0	2	1	1	0	0	1	1	1	2	0	0	1	0	0	0	0	0	0	0	0	0	0	0	0										0	0	0	0
410	29	1	0	0	1	0	7	3	0	0	0	0	0	0	1	0	0	0	1	1	4	1	1	1	0	1	0	1	0	1	1	0	0	0	0	0	36	74	26		100	60	170	52		1	1	1	0
301	34	1	0	0	1	5	3	3	0	0	0	0	2	1	1	0	0	1	1	1		0	1	1	0	0	1	0	0	0	0	0	0	0	0	0										0	0	0	0
206	55	0	0	0	1	0	0	3	0	0	0	0	0	0	1	0	0	1	1	1		0	0	0	0	0	0	0	0	0	0	0	1	0	0	0										1	1	1	0
307	40	1	0	0	1	0	5	3	0	0	0	0	0	0	1	0	0	1	1	1	5	1	0	0	0	0	1	1	0	0	0	0	0	0	0	0										0	0	0	0
248	42	0	0	0	1	0	6	2	1	0	0	0	0	0	1	0	0	1	1	1	1	1	0	1	0	0	0	0	0	0	0	0	0	0	0	0	38									0	0	0	0
190	26	1	0	0	1	0	0	3	0	0	1	0	2	1	1	0	0	1	1	1		0	0	0	0	0	0	1	0	0	0	0	0	0	0	0										0	0	0	0
37	34	1	0	0	1	0	0	3	0	0	0	0	2	1	1	0	0	2	1	1	5	1	0	0	0	0	1	1	0	0	1	0	0	1	0	0	37			98						0	0	0	0
213	27	0	0	0	1	0	3	3	0	0	0	0	0	0	1	0	0	1	1	1	6	1	0	1	0	0	1	0	1	0	0	0	0	0	0	0	37									0	0	0	0
303	28	0	0	0	1	0	5	3	0	0	0	0	0	0	1	0	0	1	1	1		1	0	1	0	1	1	0	0	0	0	0	0	1	0	0										0	0	0	0
271	22	1	0	0	1	1	8	3	0	0	0	0	0	0	1	0	0	2	1	1	3	0	0	0	0	0	1	0	1	0	0	0	0	0	0	0										0	0	0	0
28	26	0	0	0	1	4	0	0	0	0	0	0	0	0	1	0	0	0	1	1	1	1	0	0	0	0	0	0	1	0	0	0	0	0	0	0										0	0	0	0
187	34	1	0	0	1	0	6	2	1	0	0	0	0	0	1	0	0	0	1	1	4	0	0	1	0	0	1	0	0	0	0	0	0	0	0	0	37									0	0	0	0
387	41	1	0	0	1	0	3	3	0	0	0	0	2	1	0	0	0		0	1	5	0	1	0	0	0	1	0	1	0	0	0	0	0	0	0	36									0	0	0	0
275	26	1	0	0	1	4	0	3	0	0	0	0	0	0	1	0	0	1	1	1	8	1	1	0	0	1	0	0	0	1	0	0	0	0	0	0										0	0	0	0
272	42	1	0	0	1	0	3	3	0	0	0	0	2	1	1	0	0	1	1	1	9	1	1	0	0	0	0	1	0	0	0	0	0	0	0	0										0	0	0	0
277	25	1	0	0	1	0	0	3	0	0	0	0	0	0	1	0	0	2	1	1	4	1	0	0	0	0	1	0	0	0	0	0	1	0	0	0										0	0	0	0
188	39	0	0	0	1	0	7	3	0	1	0	0	0	0	1	0	0	0	1	1		1	0	0	0	0	0	0	1	0	1	0	0	0	0	0	39									0	0	0	0
391	27	1	0	0	1	0	3	3	0	0	0	0	0	0	1	0	0	1	1	1	3	1	1	0	0	0	0	0	1	0	1	0	0	0	0	0	37									0	0	0	0
208	34	1	0	0	1	0	0	3	0	0	0	0	0	0	1	0	0	1	1	1		0	1	0	0	0	1	0	0	0	0	0	0	0	0	0										1	1	1	0
216	44	1	0	0	1	0	3	3	0	0	0	0	2	1	1	0	0	1	1	1	4	0	1	1	0	0	0	0	0	0	0	0	0	0	0	0										0	0	0	0
413	47	1	0	0	1	0	0	3	0	0	0	0	0	0	0	0	0		0	1	8	1	0	0	0	0	0	1	1	0	1	0	0	0	0	0	39	80	32	91	110	64				0	0	0	0
207	41	0	0	0	1	0	0	3	0	0	0	0	0	0	1	0	0		0	1		1	0	1	0	1	0	0	0	0	0	0	0	0	0	0										0	0	0	0
392	35	1	0	0	1	4	3	3	0	0	0	0	2	1	1	0	0	1	1	1	4	1	1	0	0	0	1	0	1	0	0	0	0	1	0	0	37									0	0	0	0
44	28	1	0	0	1	0	3	0	0	0	0	0	2	1	1	0	0	1	1	1	6	1	1	0	0	1	0	1	0	0	0	0	0	0	0	0	37									0	0	0	0
165	42	0	0	0	1	0	7	3	0	0	0	0	2	1	1	0	0	1	1	1	7	0	0	0	0	0	0	0	1	0	0	0	0	0	0	0	37									0	0	0	0
408	57	1	0	0	1	0	0	1	1	0	0	0	0	0	0	0	0		0	1	6	1	0	1	0	0	1	1	0	0	0	0	0	0	0	0	38	85	20	95	124	76	156			0	0	0	0
388	34	1	0	0	1	0	3	3	0	0	0	0	2	1	1	0	0	1	1	1	7	0	1	0	0	1	0	0	1	0	1	0	0	0	0	0	36									0	0	0	0
45	42	0	0	0	1	0	0	3	0	0	0	0	2	1	1	0	0	2	1	1	4	1	0	0	0	0	0	0	1	0	1	0	0	0	0	0	38	74		97						1	1	1	0
352	36	1	0	0	1	4	0	3	0	0	0	0	0	0	1	0	0	0	1	1	1	0	1	1	0	1	1	1	0	0	0	0	0	0	0	0	37									1	1	0	1
205	38	0	0	0	1	4	5	3	0	0	0	0	0	0	1	0	0	1	1	1	1	0	1	0	0	1	0	0	0	0	0	0	0	0	0	0										0	0	0	0
35	36	0	0	0	1	0	0	3	0	0	0	0	2	1	1	0	0	2	1	1	8	1	0	1	0	0	0	1	1	0	0	0	0	0	0	0										0	0	0	0
322	37	1	0	0	1	0	3	3	0	0	0	0	2	1	1	0	0		0	1	12	1	1	1	0	1	1	0	1	0	0	0	0	0	0	0										0	0	0	0
304	33	1	0	0	1	0	3	3	0	0	0	0	0	0	1	0	0	1	1	1	2	1	0	0	1	0	0	0	0	0	0	0	0	0	0	0										0	0	0	0
[truncated: 46 more columns]
